# Supplementary material for: Synthesis and characterization of cadmium sulfide nanocrystals in the presence of a new sulfur source via a simple solvothermal method
Source: Royal Society of Chemistry journal article supplement (doi:10.1039/c3nj00996c), 2014-01-01
Supplement: c3nj00996c.pdf [file c3nj00996c.pdf]

# Synthesis and characterization of cadmium sulfide nanocrystals in the presence of a new sulfur source via a simple solvothermal method

Maryam Shakouri-Arani<sup>a</sup>, Masoud Salavati-Niasari<sup>\*b</sup>

<sup>a</sup> Department of Inorganic Chemistry, Faculty of Chemistry, University of Kashan, Kashan, P.O. Box 87317-51167, I. R. Iran

<sup>b</sup> Institute of Nano Science and Nano Technology, University of Kashan, Kashan, P.O. Box 87317-51167, I. R. Iran \*Corresponding author: Tel.: +98 361 591 2383, Fax: +98 361 555 29 30. E-mail address: [Salavati@kashanu.ac.ir](mailto:Salavati@kashanu.ac.ir)

Journal in which to be published is new journal chemistry

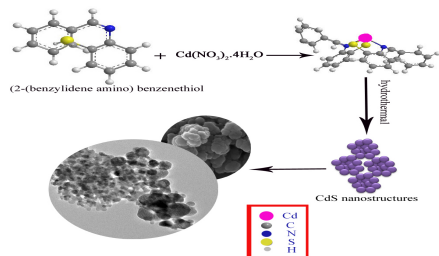

The overall synthetic procedure of the formation CdS nanostructures by using the 2-(benzylidene amino) benzenethiol as complexing and sulfuring agent
